# Supplementary material for: The Effect of Doctor-Consumer Interaction on Social Media on Consumers’ Health Behaviors: Cross-Sectional Study
Source: PubMed Central journal article supplement (PMC5852273; doi:10.2196/jmir.9003), 2018-02-28
Supplement: jmir_v20i2e73_app1.pdf [file jmir_v20i2e73_app1.pdf]

Table A1. Measurement instruments

| Constructs               | Items                                                                                                                                                                                                                                                                                                                                                                                                                                                      |
|--------------------------|------------------------------------------------------------------------------------------------------------------------------------------------------------------------------------------------------------------------------------------------------------------------------------------------------------------------------------------------------------------------------------------------------------------------------------------------------------|
| Instrumental Interaction | <ul style="list-style-type: none"> <li>The doctors who I interact with in social media have skills to solve my problems/concerns</li> <li>The doctors who I interact with in social media give me required suggestions and information.</li> <li>My interaction with doctor in social media is about the solution of my health concern.</li> </ul>                                                                                                         |
| Affective interaction    | <ul style="list-style-type: none"> <li>During my interaction with the doctors in social media, the doctors show their interest in my problems/concerns.</li> <li>During my interaction with the doctors in social media, the doctors demonstrate sufficient devotion to the management of my problems</li> <li>During my interaction with doctors in social media, the doctors give me emotional support.</li> </ul>                                       |
| Declarative knowledge    | <p><i>Copyright of this scale is held by Prof. Bernadette Mazurek Melnyk.</i></p>                                                                                                                                                                                                                                                                                                                                                                          |
| Self-efficacy            | <ul style="list-style-type: none"> <li>I will be able to achieve most of the goals that I have set for myself.</li> <li>In general, I think that I can obtain outcomes that are important to me.</li> <li>I am confident that I can perform effectively on many healthy lifestyle behaviors.</li> <li>I know how to deal with things in a healthy way that bother me</li> <li>Compared with other people, I do most healthy behaviors very well</li> </ul> |
| Outcome expectancy       | <ul style="list-style-type: none"> <li>If I do healthy lifestyle behaviors more than before, I will sleep better.</li> <li>If I do healthy lifestyle behaviors more than before, I will feel refreshed.</li> <li>If I do healthy lifestyle behaviors more than before, I would feel</li> </ul>                                                                                                                                                             |

Healthy behaviors

better mentally.

*Copyright of this scale is held by Prof. Bernadette Mazurek*

*Melnyk.*

---
